# Supplementary material for: Design and synthesis of ultrasensitive off–on fluoride detecting fluorescence probe via autoinductive signal amplification
Source: Royal Society of Chemistry journal article supplement (doi:10.1039/c4an01723d), 2014-10-28
Supplement: c4an01723d1.pdf [file c4an01723d1.pdf]

## Supporting Information

### Design and Synthesis of Ultrasensitive Off-On Fluoride Detecting

### Fluorescence Probe via Autoinductive Signal Amplification

Jiun-An Gu<sup>1</sup>, Veerappan Mani<sup>1</sup>, Sheng-Tung Huang<sup>1,2\*</sup>

<sup>1</sup>Department of Chemical Engineering and Biotechnology, National Taipei University of Technology, Taipei, Taiwan (Republic of China).

<sup>2</sup>Graduate Institute of Biomedical and Biochemical Engineering, National Taipei University of Technology, Taipei, Taiwan (Republic of China).

\* Corresponding author: Email id: [ws75624@ntut.edu.tw](mailto:ws75624@ntut.edu.tw) Tel.: +886 2271-2171 2525;

Fax: +886-02-2731-7117.

## Materials and Instrumentation

All the chemicals were purchased from Acros Organics, Sigma-Aldrich, Showa Chemical Industry Co., or TCI America and were used without further purification. All reactions requiring anhydrous conditions were performed in oven-dried glassware under an Ar or a N<sub>2</sub> atmosphere. Chemicals and solvents were either puriss p.a. or purified by standard techniques. Analytical thin-layer chromatography (TLC) was performed on glass plate-mounted silica gel 60F<sub>254</sub> (Merck) with a thickness of 0.2 mm. Flash column chromatography was performed using Silicycle silica gel 60. The synthesized compounds were characterized using <sup>1</sup>H NMR (Bruker Advance 300MHz) and <sup>13</sup>C NMR (Bruker Advance 75MHz). Mass spectra were recorded using a Finnigan TSQ 700 triple quadrupole mass spectrometer equipped with an electrospray ionization (ESI) ion source. Photoluminescence spectra were measured with HORIBA FluoroMax-4 spectrometer.

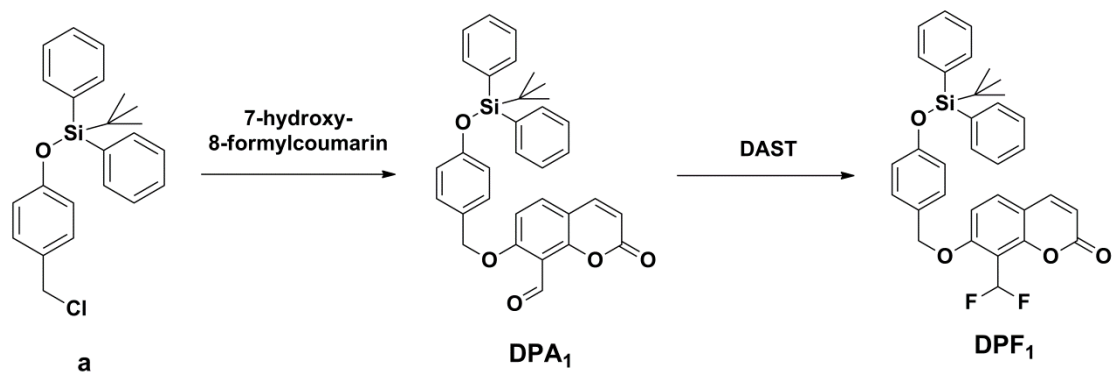

**Scheme S1:** Scheme for the synthesis of 7-((4-(tert-butyl-diphenylsilyloxy)benzyl)oxy)-8-(difluoromethyl)-coumarin (DPF<sub>1</sub>). DAST: Diethylaminosulfur trifluoride.

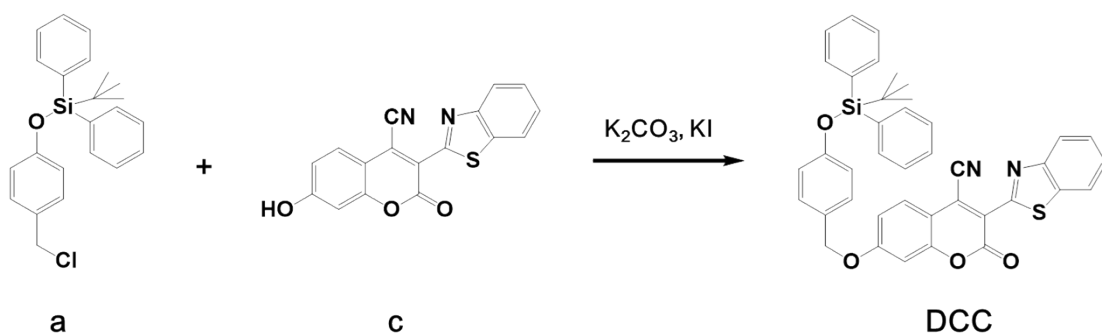

**Scheme S2:** Scheme for the synthesis of 3-(benzothiazol-2-yl)-4-cyanitrile-7-((4-(tert-butyl-diphenylsilyloxy)benzyl)oxy)coumarin (DCC).



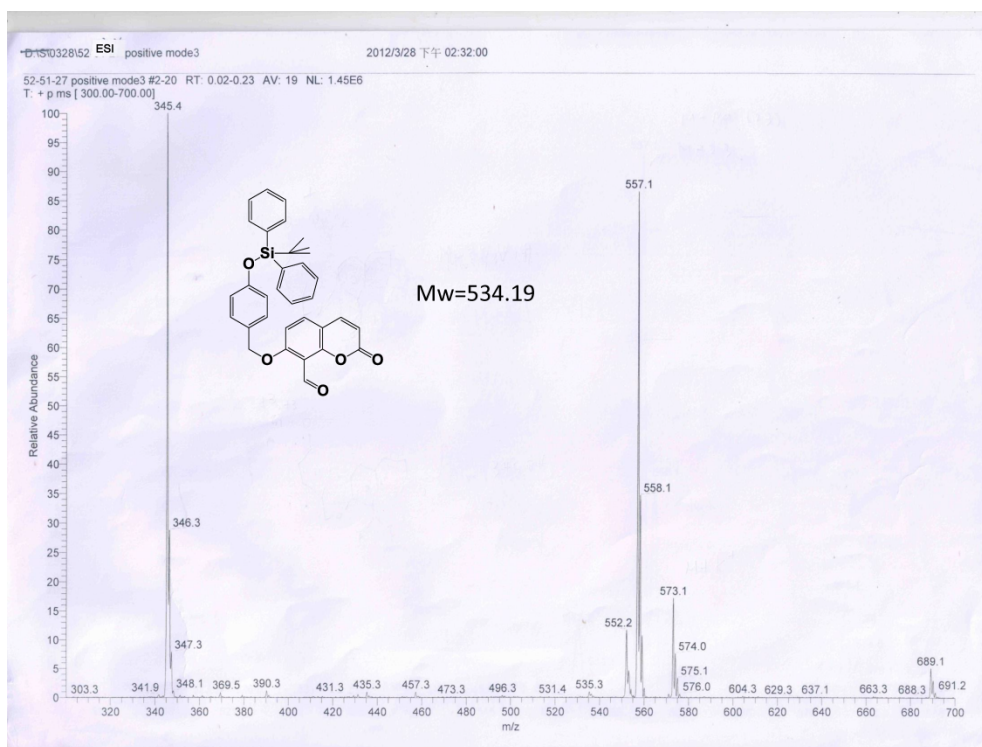

Fig. S3. Mass spectrum (ESI+) of DPA<sub>1</sub>.

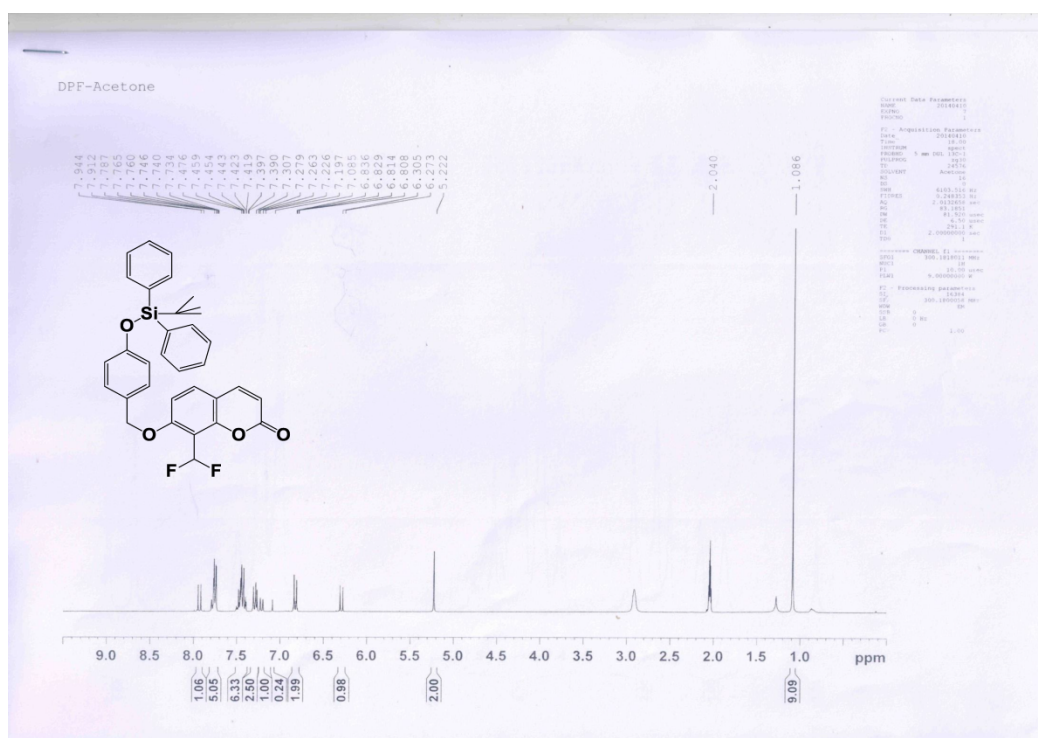

Fig. S4. <sup>1</sup>H NMR spectrum of DPF<sub>1</sub>.

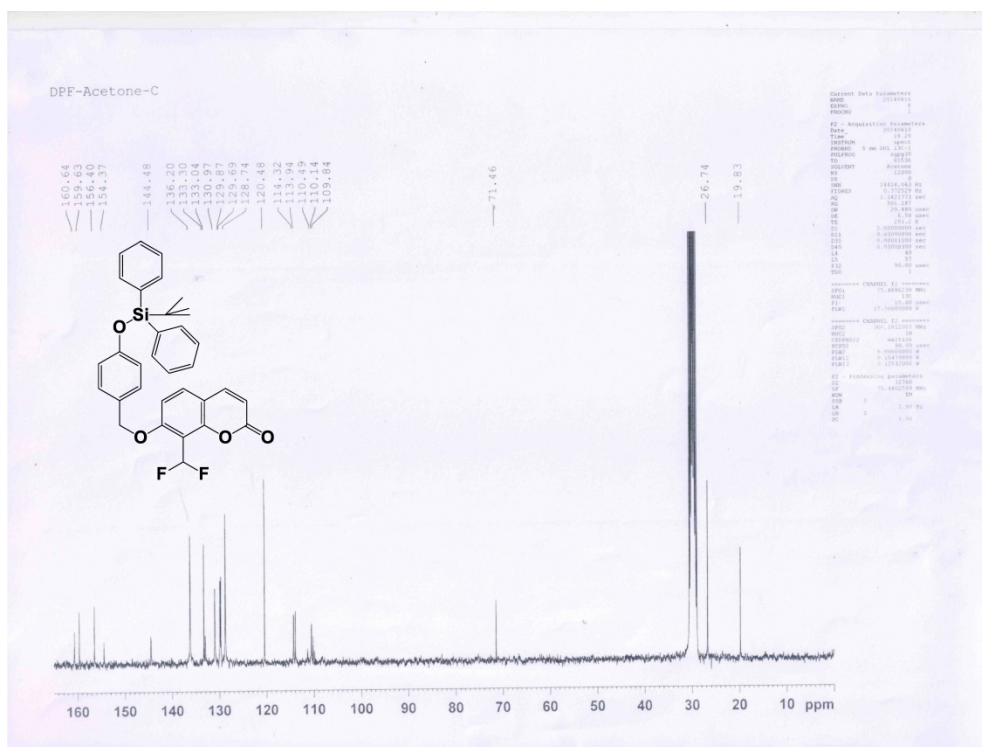

Fig. S5. <sup>13</sup>C NMR spectrum of DPF<sub>1</sub>.

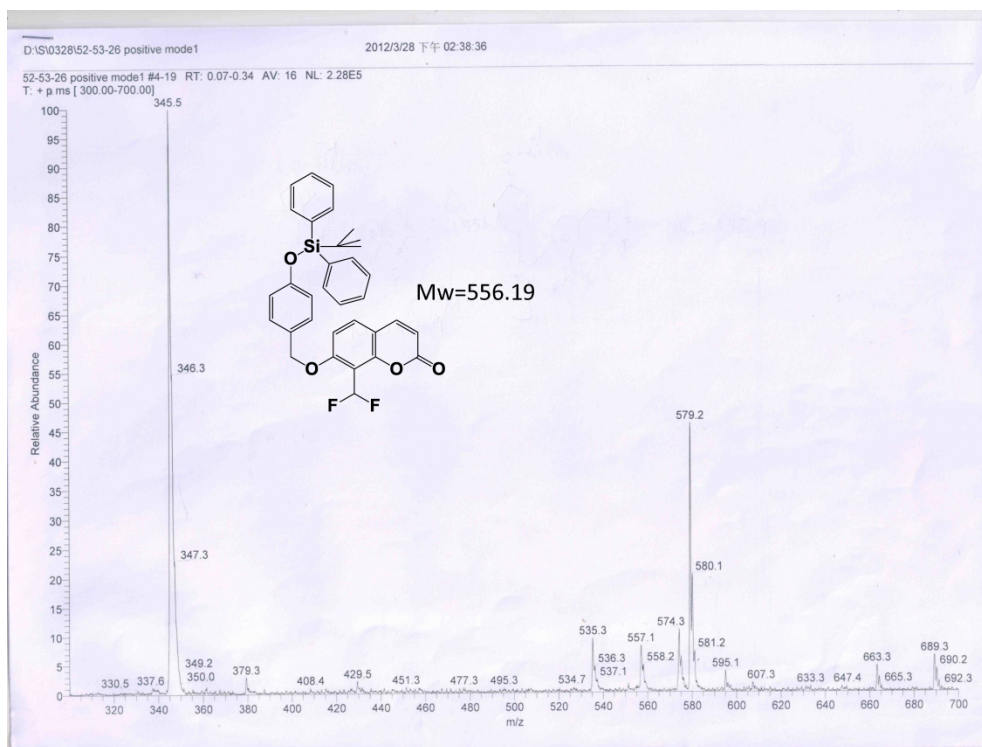

Fig. S6. Mass spectrum (ESI+) of DPF<sub>1</sub>.

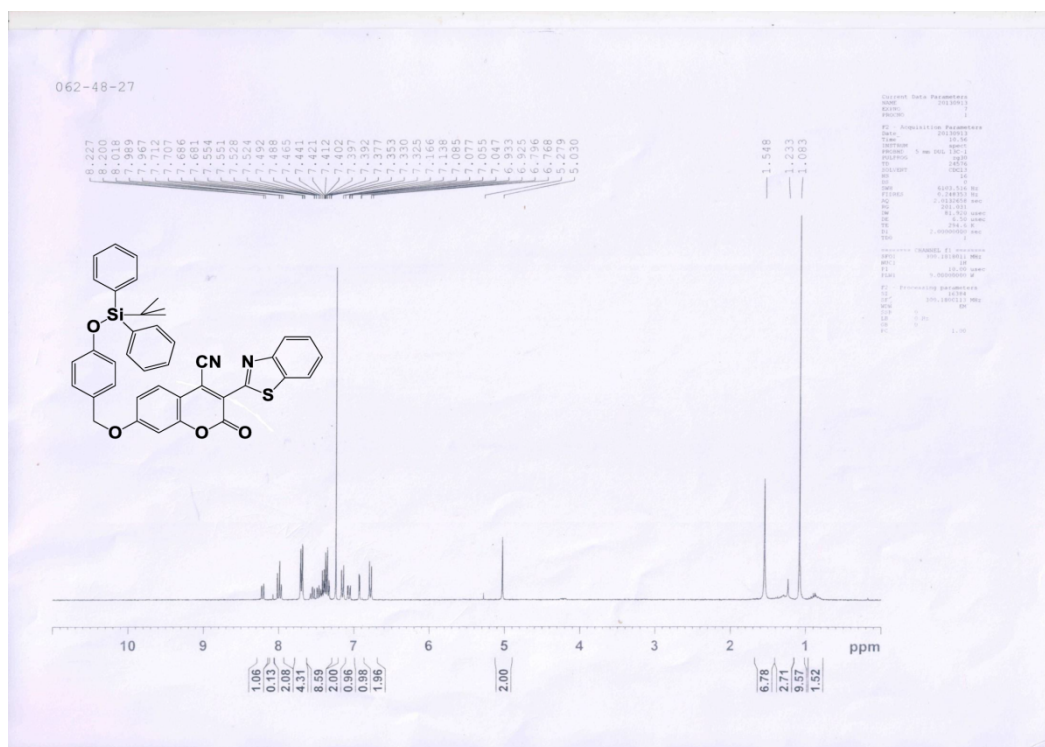

Fig. S7. <sup>1</sup>H NMR spectrum of DCC.

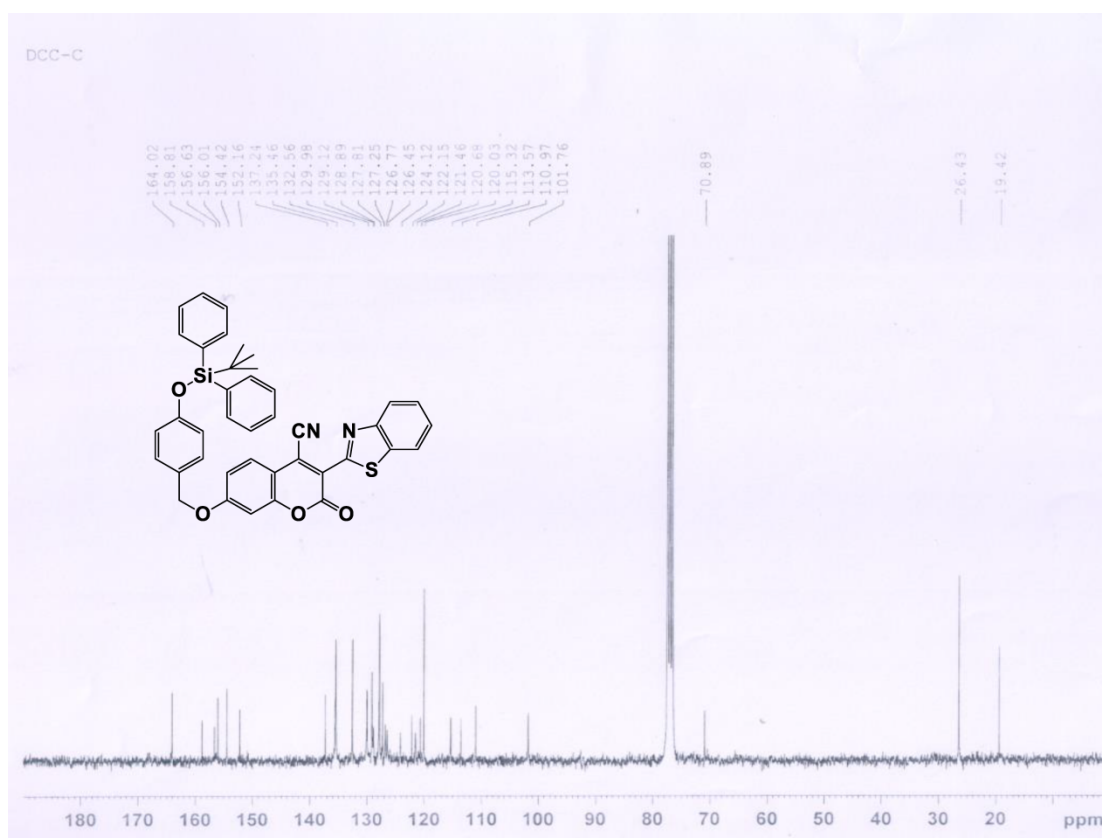

Fig. S8. <sup>13</sup>C NMR spectrum of DCC.

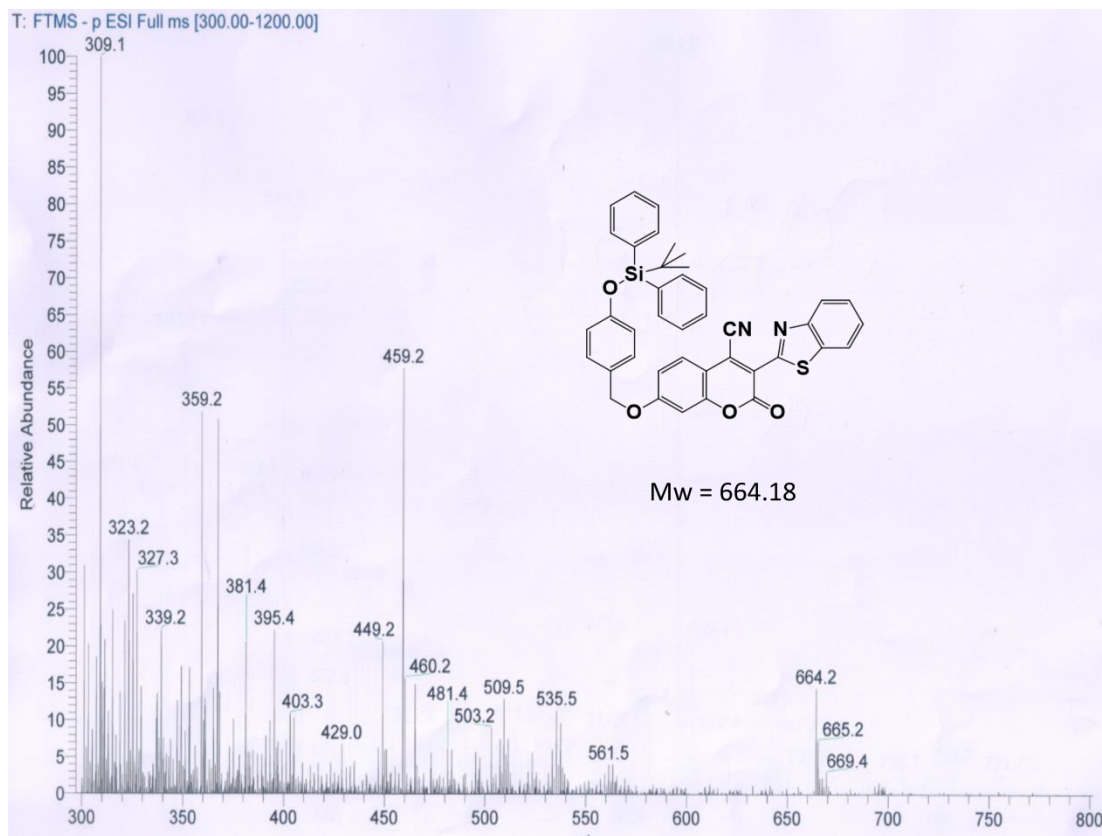

**Fig. S9. Mass spectrum (ESI+) of DCC.**
